# Supplementary material
Source: PubMed Central journal article supplement (PMC7704945)

# Supplementary figure 1.

Fig. 1

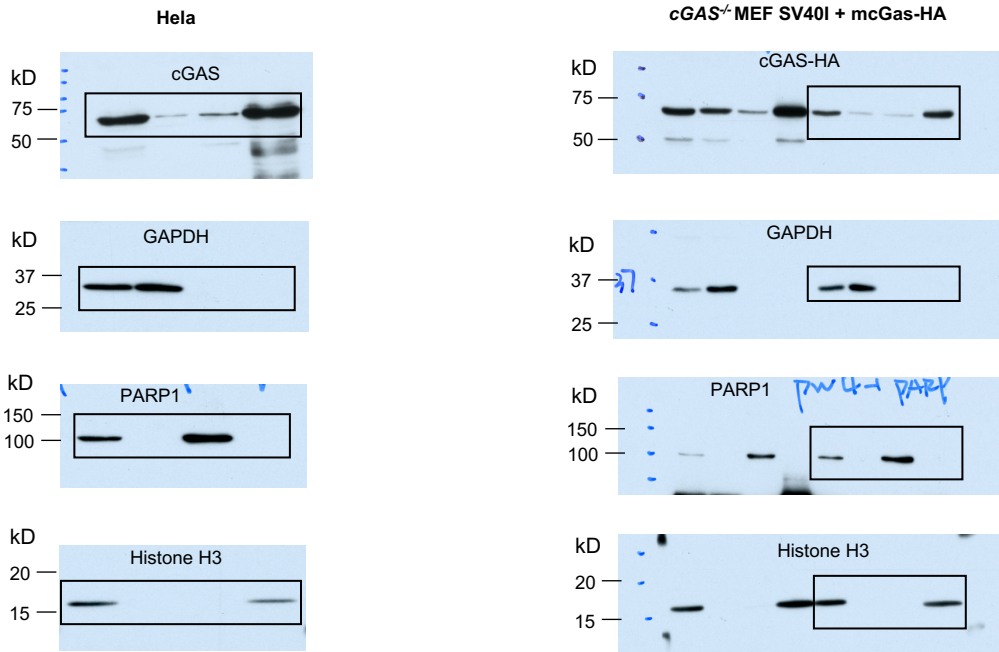

Fig. 4a

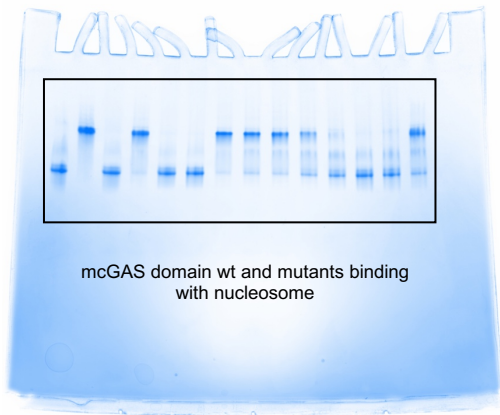

Fig. 4c

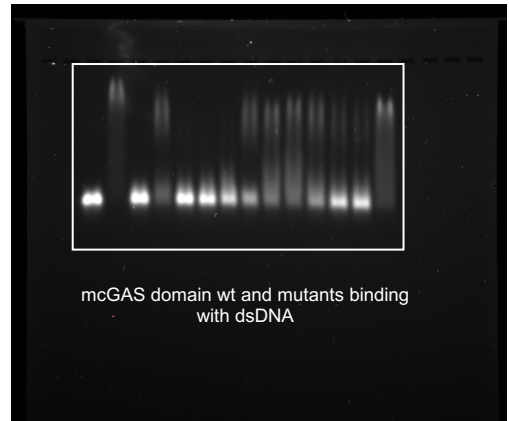

Extended Data Fig. 1a

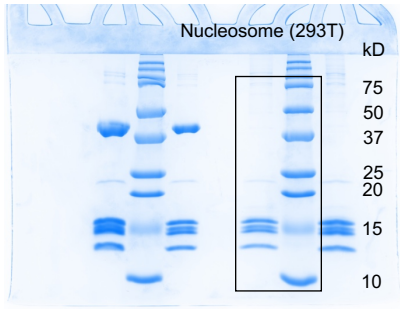

Extended Data Fig. 1b

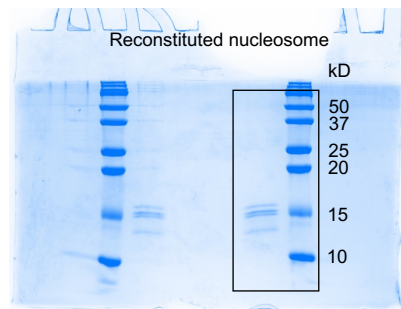

Extended Data Fig. 1d

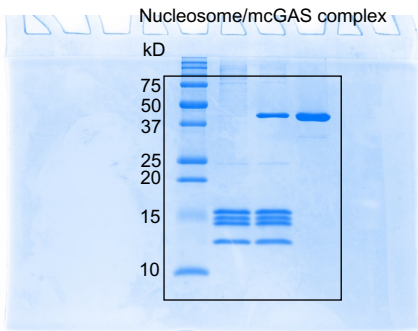

Extended Data Fig. 1e

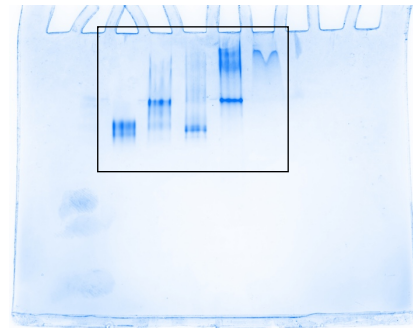

Extended Data Fig. 1f

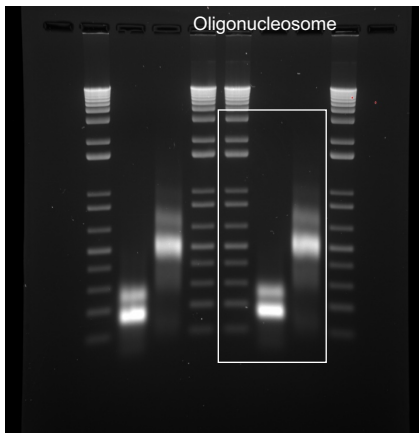

Extended Data Fig. 1g

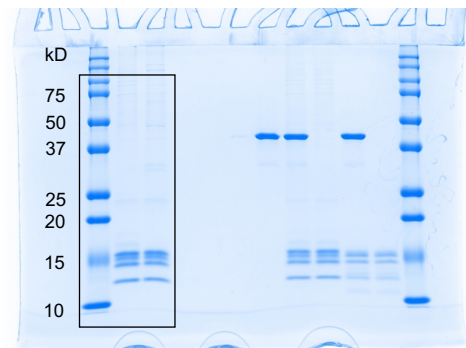

Extended Data Fig. 1h

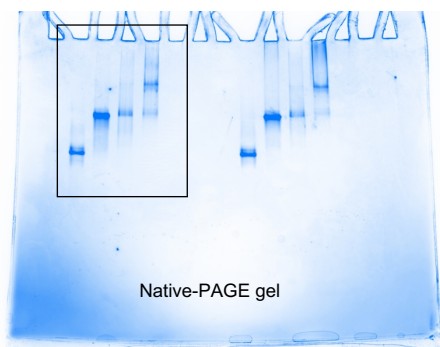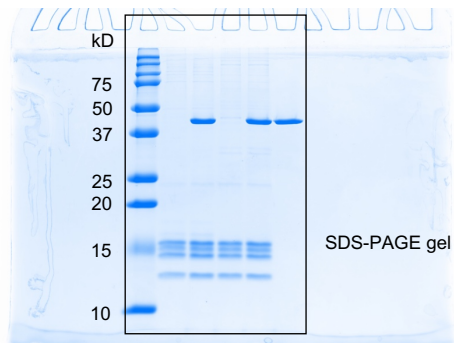

Extended Data Fig. 1h

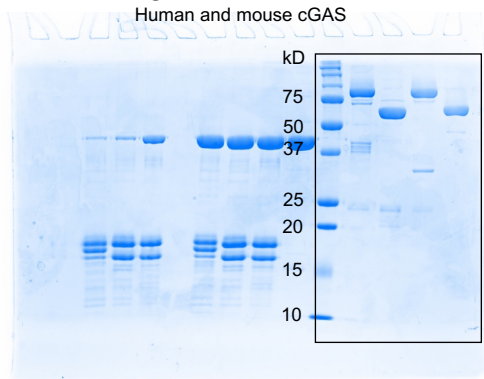

Extended Data Fig. 2i

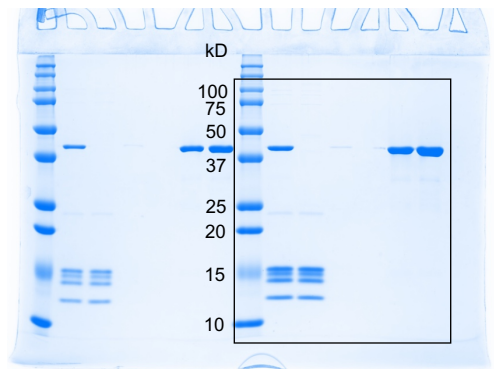

Extended Data Fig. 2j

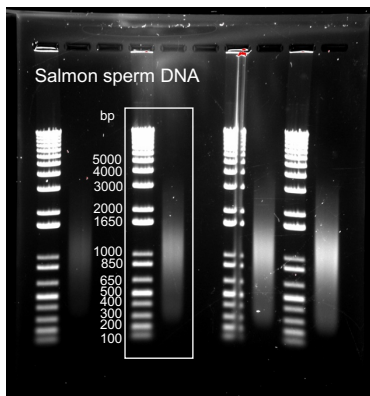

Extended Data Fig. 3a

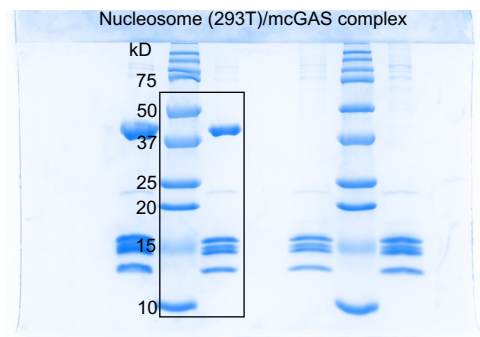

Extended Data Fig. 3b

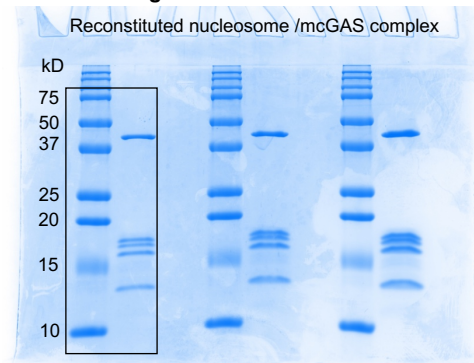

Extended Data Fig. 3i

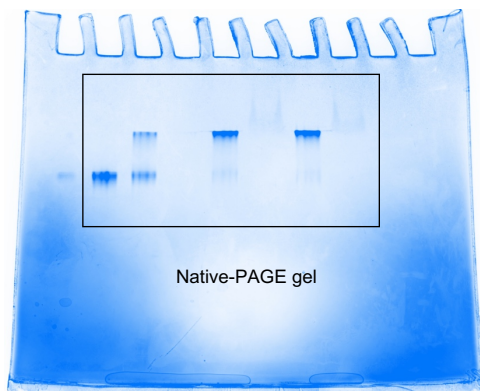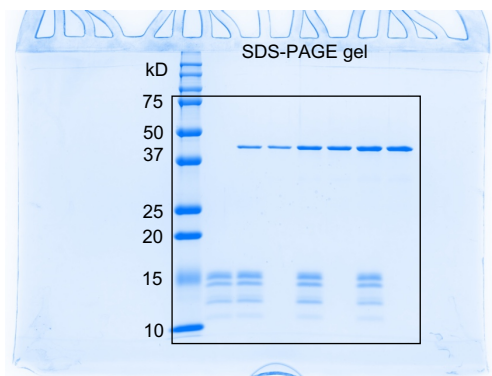

Extended Data Fig. 6d

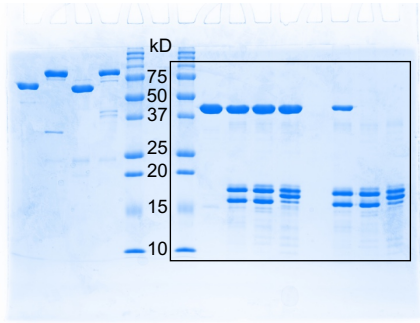

Extended Data Fig. 6f

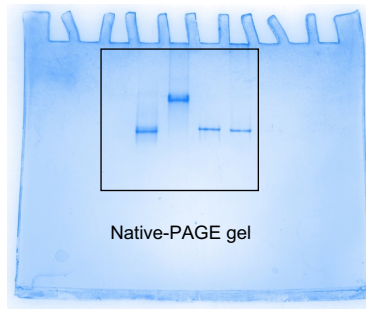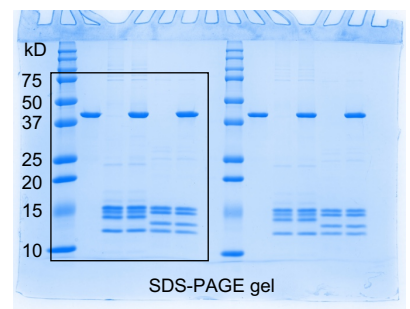

Extended Data Fig. 7a

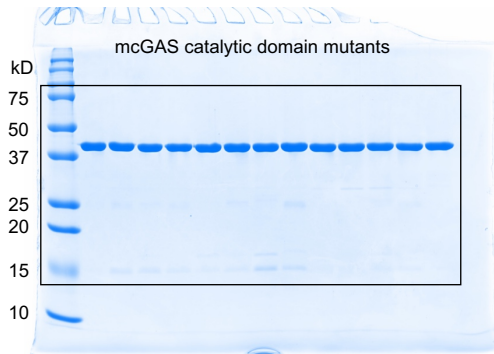

Extended Data Fig. 7b

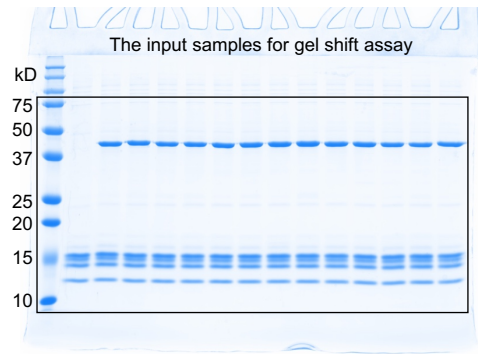

Extended Data Fig. 7c

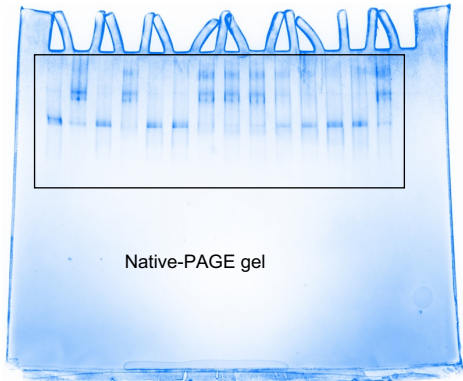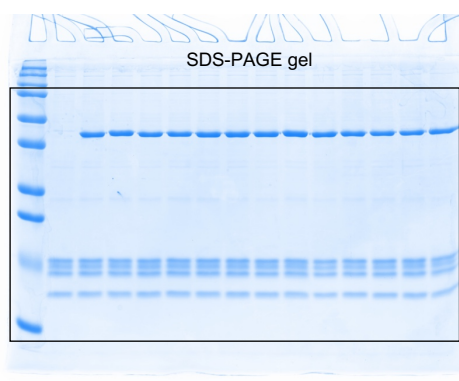

Extended Data Fig. 8a

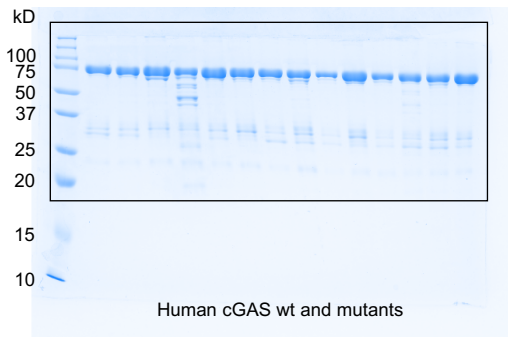

Extended Data Fig. 9a

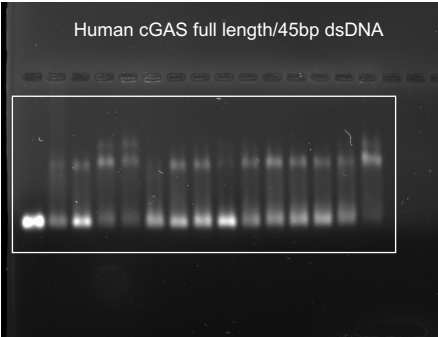

Extended Data Fig. 9e

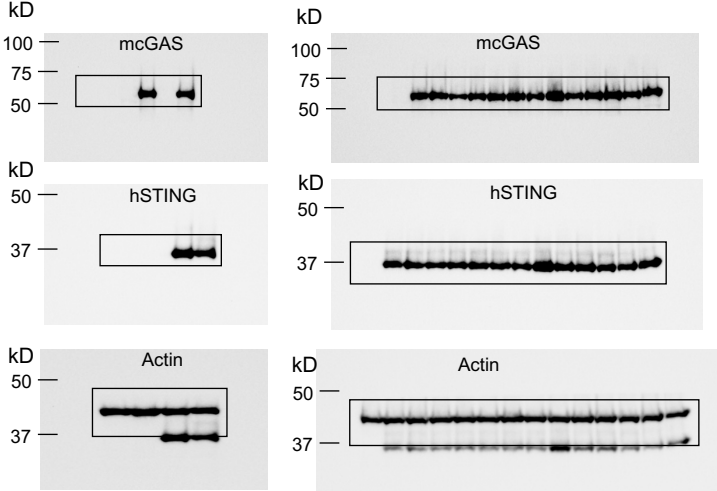

Extended Data Fig. 9f

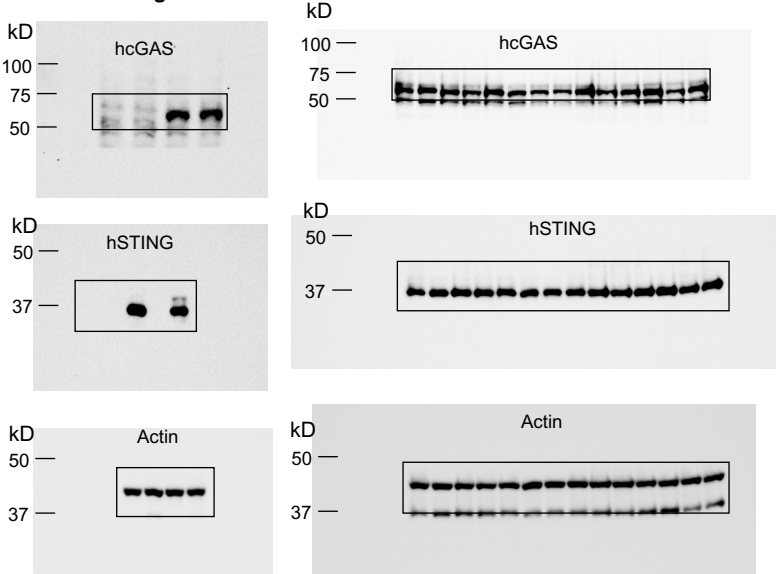

Supplement: NIHMS1620035-supplement-1.pdf [file NIHMS1620035-supplement-1.pdf]
